# Supplementary material for: Geographic disparity in premature mortality in Ontario, 1992–1996
Source: Springer Nature journal article supplement (doi:10.1186/1476-072x-2-7), 2003-09-25
Supplement: Additional file 2 [file 1476-072x-2-7-s2.doc]

**Table 4**

#### Standardized mortality ratios for females by public health unit, ages 0-74, 1992-1996

| **Public Health Unit** | **Inf.** | **Neo.** | **End.** | **Blo.** | **Men.** | **Ner.** | **Cir.** | **Res.** | **Dig.** | **Gen.** | **Pre.** | **Ski.** | **Mus.** | **Con.** | **Per.** | **Sym.** | **Inj.** | **All** |
| --- | --- | --- | --- | --- | --- | --- | --- | --- | --- | --- | --- | --- | --- | --- | --- | --- | --- | --- |
| Windsor-Essex | 1.01 | 1.09* | 1.02 | 0.80 | 0.66* | 1.21* | 1.18* | 0.98* | 1.33* | 0.74* | - - | - - | 1.12 | 0.96 | 0.92* | 0.88* | 1.14* | 1.10* |
| Chatham-Kent | 0.82* | 1.17* | 1.93* | - - | 1.53* | 1.32* | 1.50* | 1.22* | 1.22* | 2.11* | - - | - - | 1.48 | 1.47* | 0.85 | 0.63* | 1.25* | 1.29* |
| Lambton | 0.77* | 0.95* | 1.04 | 2.01 | 1.02 | 1.05 | 1.07* | 1.05* | 0.82* | 1.17 | - - | - - | - - | 1.64* | 0.75* | 0.53* | 0.66* | 0.97* |
| Middlesex-London | 1.53* | 1.04* | 0.93* | 0.61* | 1.37* | 1.15* | 0.97* | 0.94* | 1.04* | 1.25* | - - | - - | 0.58* | 1.06* | 1.18* | 0.84* | 1.04* | 1.02* |
| Elgin-St. Thomas | - - | 0.99* | 1.88* | - - | 1.78* | 0.66* | 1.12* | 1.26* | 1.13* | - - | - - | - - | 2.47 | 1.50* | 1.05 | - - | 1.17* | 1.07* |
| Oxford | 0.82 | 0.94* | 1.05 | - - | 2.30* | 1.29* | 1.07* | 1.10* | 1.45* | 1.08 | - - | - - | 1.47 | 1.42* | 1.21 | 0.49* | 1.11* | 1.04* |
| Grey-Bruce-Owen Sound | 0.77* | 1.03* | 1.01 | - - | 1.33* | 0.89* | 1.08* | 1.21* | 0.93* | 1.40* | - - | - - | 1.56* | 0.81* | 0.87 | 0.71* | 1.00 | 1.04* |
| Huron | - - | 1.02* | 0.64* | - - | - - | 1.22* | 1.16* | 0.72* | 0.76* | - - | - - | - - | - - | 1.00 | - - | 0.86 | 1.31* | 1.00 |
| Perth | 0.97 | 0.95* | 1.14* | 3.18 | 1.22 | 0.97 | 0.98* | 1.03 | 1.18* | 0.93 | - - | - - | - - | 0.78 | - - | 0.91 | 0.91* | 0.97* |
|  |  |  |  |  |  |  |  |  |  |  |  |  |  |  |  |  |  |  |
| Brant | 0.68* | 1.13* | 0.73* | - - | 0.89 | 1.32* | 1.24* | 1.39* | 1.29* | 1.14 | - - | - - | 1.64 | 1.42* | 0.85 | 0.90* | 0.90* | 1.14* |
| Haldimand-Norfolk | 1.45* | 1.03* | 0.78* | - - | 0.84 | 0.94 | 1.21* | 1.05 | 1.04 | 1.29 | - - | - - | - - | 1.04 | 1.22 | 0.58* | 1.51* | 1.09* |
| Hamilton | 1.34* | 1.05* | 0.91* | 0.57* | 0.83* | 1.10* | 1.11* | 0.98* | 1.16* | 1.35* | - - | - - | 0.99 | 1.19* | 1.08* | 1.18* | 1.08* | 1.07* |
| Niagara | 0.75* | 1.05* | 1.03* | 1.41* | 0.87* | 0.97* | 1.05* | 0.98* | 1.23* | 0.66* | - - | - - | 0.89* | 1.17* | 1.00 | 0.99 | 1.03* | 1.04* |
|  |  |  |  |  |  |  |  |  |  |  |  |  |  |  |  |  |  |  |
| Halton | 0.62* | 1.04* | 0.57* | 0.74* | 1.02 | 0.88* | 0.78* | 0.71* | 0.86* | 0.90* | - - | - - | 0.62* | 0.84* | 0.80* | 0.38* | 0.67* | 0.87* |
| Peel | 0.86* | 0.88* | 0.94* | 1.04 | 0.65* | 0.67* | 0.80* | 0.71* | 0.80* | 1.00 | - - | - - | 0.82* | 0.78* | 1.08* | 0.53* | 0.77* | 0.83* |
| Waterloo | 0.86* | 0.98* | 0.99 | 0.78* | 0.75* | 1.00 | 1.02* | 1.01 | 0.95* | 0.79* | - - | - - | 1.10 | 0.87* | 0.71* | 0.74* | 0.86* | 0.96* |
| Wellington-Dufferin-Guelph | 1.13 | 1.06* | 0.70* | - - | 1.12 | 1.19* | 0.98* | 0.93* | 0.77* | 0.88 | - - | - - | - - | 1.23* | 0.65* | 0.59* | 0.95* | 0.98* |
|  |  |  |  |  |  |  |  |  |  |  |  |  |  |  |  |  |  |  |
| Toronto | 1.37* | 0.91* | 0.99* | 1.05* | 0.85* | 0.89* | 0.84* | 0.84* | 0.93* | 0.97* | 0.81* | 0.74* | 0.90* | 0.98* | 1.43* | 1.57* | 0.88* | 0.92* |
|  |  |  |  |  |  |  |  |  |  |  |  |  |  |  |  |  |  |  |
| Simcoe | 0.73* | 1.05* | 1.06* | 1.59* | 0.44* | 1.03 | 1.11* | 1.01 | 1.06* | 0.94 | - - | - - | 1.46* | 1.02 | 0.45* | 0.79* | 1.15* | 1.05* |
| York | 0.74* | 0.94* | 0.82* | 0.82* | 0.64* | 1.13* | 0.80* | 0.87* | 0.67* | 0.79* | - - | - - | 0.75* | 0.60* | 0.86* | 1.06* | 0.73* | 0.87* |
| Durham | 0.66* | 1.01* | 0.88* | 1.13 | 1.73* | 1.08* | 0.96* | 1.24* | 0.97* | 0.95 | 2.39 | - - | 1.21* | 0.69* | 0.59* | 1.10* | 0.78* | 0.98* |
| Haliburton-Kawartha-Pine Ridge | 0.98 | 0.95* | 0.82* | 1.88* | 1.06 | 0.80* | 1.02* | 1.01 | 0.91* | 0.73* | - - | - - | 0.86 | 0.91 | 0.64* | 1.06 | 0.87* | 0.96* |
| Peterborough | 0.90 | 1.09* | 0.85* | - - | 1.55* | 1.00 | 0.96* | 1.08* | 0.78* | 1.35* | - - | - - | 1.16 | 1.16 | - - | 1.15* | 1.08* | 1.03* |
|  |  |  |  |  |  |  |  |  |  |  |  |  |  |  |  |  |  |  |
| Ottawa-Carleton | 0.88* | 0.99* | 0.88* | 0.76* | 0.77* | 0.96* | 0.90* | 0.94* | 0.96* | 1.02 | - - | - - | 1.12* | 1.05* | 1.06* | 0.68* | 0.88* | 0.95* |
| Renfrew | 1.04 | 1.03* | 1.12* | - - | 0.87 | 0.81* | 1.15* | 1.25* | 1.42* | 1.20 | - - | - - | 1.44 | 0.73* | - - | 0.85* | 1.21* | 1.08* |
| Eastern Ontario | 0.90 | 1.10* | 1.20* | 1.28 | 1.67* | 1.10* | 1.27* | 1.20* | 0.97 | 0.84* | - - | - - | 0.81 | 0.91 | 0.68* | 0.88* | 1.32* | 1.14* |
| Kingston-Frontenac- Lennox-Addington | 0.85* | 0.98* | 0.96 | - - | 0.79* | 1.51* | 1.15* | 1.37* | 0.93* | 1.14 | - - | - - | 0.95 | 1.21* | 1.34* | 0.95 | 1.01 | 1.06* |
| Hastings-Prince Edward | 0.80* | 1.20* | 1.19* | - - | 1.18 | 1.04 | 1.22* | 1.49* | 1.16* | 0.82* | - - | - - | 1.04 | 1.56* | 0.88 | 1.00 | 1.37* | 1.20* |
| Leeds-Grenville-Lanark | 0.84* | 1.20* | 1.05* | - - | 1.87* | 0.80* | 1.07* | 1.48* | 1.18* | 0.95 | - - | - - | 1.44* | 1.31* | 1.17 | 0.70* | 1.34* | 1.16* |
|  |  |  |  |  |  |  |  |  |  |  |  |  |  |  |  |  |  |  |
| Algoma | 0.90 | 1.15* | 1.38* | - - | 1.77* | 0.90* | 1.27* | 1.40* | 1.39* | 0.95 | - - | - - | - - | 1.70* | 1.12 | 1.15* | 1.23* | 1.21* |
| Porcupine | 0.70* | 1.09* | 1.21* | - - | 2.20* | 0.93 | 1.40* | 1.57* | 1.27* | 1.91* | - - | - - | - - | 1.10 | - - | 0.96 | 1.84* | 1.25* |
| Sudbury | 0.59* | 1.06* | 1.38* | 1.42 | 1.09 | 1.16* | 1.56* | 1.50* | 0.97 | 1.35* | - - | - - | 1.35* | 0.84* | 1.28* | 0.84* | 1.57* | 1.24* |
| Muskoka-Parry Sound | 0.76* | 0.96* | 0.72* | - - | 0.78 | 1.26* | 1.10* | 1.07* | 0.81* | 0.82 | - - | - - | 1.07 | 0.84 | 1.22 | 1.00 | 1.22* | 1.01* |
| North Bay | - - | 1.16* | 1.67* | - - | 1.42 | 1.55* | 1.19* | 1.52* | 0.78* | 1.11 | - - | - - | - - | 1.29 | - - | 0.90 | 1.53* | 1.20* |
| Timiskaming | - - | 1.29* | 1.74* | 5.76 | - - | 1.45* | 1.23* | 1.65* | 1.16 | - - | - - | - - | - - | 1.59 | - - | 1.22 | 1.45* | 1.31* |
| Thunder Bay | 1.05 | 1.06* | 1.47* | - - | 1.27 | 1.10* | 1.34* | 0.97 | 1.53* | 0.72* | - - | - - | 1.42 | 1.27* | 0.95 | 0.77* | 1.42* | 1.17* |
| Northwestern | 1.05 | 1.08* | 1.91* | - - | 2.63* | 1.23* | 1.01 | 0.96 | 1.21* | 1.31 | - - | - - | - - | 0.81* | 0.73* | 1.53* | 3.58* | 1.27* |

Data source: Vital Statistics Records, Office of the Registrar General, Ontario Ministry of Consumer and Commercial Relations

**Notes:**

**Inf.:** Infectious and Parasitic Diseases; **Neo.:** Neoplasms; **End.:** Endocrine, Nutritional and Metabolic Diseases and Immunity Disorders; **Blo.:** Diseases of Blood and Blood-Forming Organs; **Men.:** Mental Disorders; **Ner.:** Diseases of the Nervous System and Sense Organs; **Cir.:** Diseases of the Circulatory System; **Res.:** Diseases of the Respiratory System; **Dig.:** Diseases of the Digestive System; **Gen.:** Diseases of the Genitourinary System; **Pre.:** Complications of Pregnancy, Childbirth and Puerperium; **Ski.:** Diseases of the Skin and Subcutaneous Tissue; **Mus.:** Diseases of the Musculoskeletal System and Connective Tissue; **Con.:** Congenital Anomalies; **Per.:** Certain Conditions Originating in the Perinatal Period; **Sym.:** Symptoms, Signs and Ill-Defined Conditions; **Inj.:** Injury and Poisoning; **All.:** All Causes

* Indicates statistical significance from provincial rate (p < 0.05)

- - Indicates too few deaths to calculate a reliable SMR (less than five observed deaths)
