# Supplementary material for: Geographic disparity in premature mortality in Ontario, 1992–1996
Source: Springer Nature journal article supplement (doi:10.1186/1476-072x-2-7), 2003-09-25
Supplement: Additional file 3 [file 1476-072x-2-7-s3.doc]

**Table 5**

**Demographic, social, economic and health characteristics for public health units and health areas, 1996**

| **Public Health Unit** | **1994 Population (ages 0-74)** | **Umemp. Rate** | **Low Income** | **< Gr. 9 Educ.** | **Health Area**† | **Reg. Smoker** | **Reg. Exercise** | **BMI >27** | **Heavy Drink.** | **Social Support** |
| --- | --- | --- | --- | --- | --- | --- | --- | --- | --- | --- |
| Windsor-Essex | 335,000 | 7.7 | 11.9 | 11.1 | Essex | 24.6* | 58.9 | 30.4 | 5.8 | 89.7 |
| Chatham-Kent | 109,000 | 8.4 | 11.2 | 12.3 | Kent, Lambton | 22.5 | 58.9 | 33.5* | 4.5 | 91.8* |
| Lambton | 129,000 | 9.5 | 9.7 | 8.2 |
| Middlesex-London | 382,000 | 8.9 | 13.5 | 7.4 | Elgin, Oxford, Middlesex | 20.8 | 63.7 | 27.2 | 4.9 | 89.4 |
| Elgin-St. Thomas | 77,000 | 9.2 | 10.4 | 12.0 |
| Oxford | 95,000 | 7.8 | 9.0 | 11.4 |
| Grey-Bruce-Owen Sound | 149,000 | 8.7 | 11.2 | 12.0 | Bruce, Grey, Perth, Huron | 22.0 | 59.8 | 34.7* | 5.5 | 90.9 |
| Huron | 57,000 | 6.5 | 10.2 | 12.5 |
| Perth | 70,000 | 5.3 | 7.1 | 13.2 |
|  |  |  |  |  |  |  |  |  |  |  |
| Brant | 116,000 | 8.3 | 12.5 | 10.0 | Brant, Haldimand-Norfolk | 25.1* | 59.7 | 32.7* | 4.0 | 90.9 |
| Haldimand-Norfolk | 101,000 | 9.3 | 9.1 | 13.3 |
| Hamilton | 450,000 | 9.1 | 18.5 | 11.5 | Hamilton | 20.8 | 61.6 | 29.2 | 4.7 | 89.5 |
| Niagara | 391,000 | 9.6 | 12.5 | 10.6 | Niagara | 23.7* | 64.4* | 32.2* | 5.9 | 89.9 |
|  |  |  |  |  |  |  |  |  |  |  |
| Halton | 332,000 | 5.6 | 7.5 | 4.9 | Halton | 19.0 | 65.1* | 27.1 | 4.8 | 91.7* |
| Peel | 826,000 | 8.1 | 13.6 | 8.0 | Peel | 19.1 | 57.5* | 27.6 | 5.0 | 89.4 |
| Waterloo | 395,000 | 7.9 | 11.8 | 10.7 | Waterloo | 22.6 | 59.4 | 29.3 | 6.3 | 90.5 |
| Wellington-Dufferin-Guelph | 209,000 | 5.9 | 8.9 | 8.7 | Wellington-Dufferin | 21.3 | 59.8 | 27.1 | 5.5 | 91.5* |
|  |  |  |  |  |  |  |  |  |  |  |
| Toronto | 2,262,000 | 10.7 | 24.4 | 12.2 | Toronto | 16.9* | 57.5* | 22.7* | 4.9 | 87.5* |
|  |  |  |  |  |  |  |  |  |  |  |
| Simcoe | 313,000 | 8.9 | 11.1 | 8.0 | Simcoe | 22.0 | 60.7 | 31.9* | 5.4 | 91.9* |
| York | 575,000 | 6.8 | 11.5 | 8.8 | York | 16.6* | 59.9 | 26.1 | 3.8 | 90.4 |
| Durham | 445,000 | 8.1 | 9.7 | 6.3 | Durham | 23.1 | 62.3 | 25.4 | 3.8 | 90.8 |
| Haliburton-Kawartha-Pine Ridge | 158,000 | 10.4 | 10.5 | 9.5 | Northumberland, Victoria, Haliburton, Peterborough | 22.9 | 62.2 | 30.2 | 5.1 | 90.7 |
| Peterborough | 119,000 | 10.4 | 13.1 | 8.3 |
|  |  |  |  |  |  |  |  |  |  |  |
| Ottawa-Carleton | 712,000 | 8.7 | 14.9 | 6.1 | Ottawa-Carleton | 20.4 | 67.0* | 25.7 | 3.9 | 88.3 |
| Renfrew | 97,000 | 9.7 | 11.3 | 12.2 | Renfrew, Prescott/ Russell, Stormont, Dundas/ Glengarry | 23.9 | 65.4* | 32.5* | 3.7 | 87.2 |
| Eastern Ontario | 182,000 | 9.5 | 12.9 | 13.1 |
| Kingston-Frontenac- Lennox-Addington | 168,000 | 9.7 | 12.6 | 7.8 | Lanark/ Leeds/ Grenville, Hastings, Prince Edward, Frontenac, Lennox/ Addington | 25.5* | 63.8* | 31.6* | 5.0 | 89.0 |
| Hastings-Prince Edward | 143,000 | 10.8 | 13.2 | 10.4 |
| Leeds-Grenville-Lanark | 149,000 | 8.4 | 9.7 | 8.1 |
|  |  |  |  |  |  |  |  |  |  |  |
| Algoma | 128,000 | 13.3 | 16.2 | 12.4 | Algoma, Cochrane | 28.5* | 62.9 | 34.6* | 6.0 | 89.2 |
| Porcupine | 93,000 | 11.6 | 12.4 | 15.8 |
| Sudbury | 201,000 | 12.5 | 14.3 | 12.9 | Manitoulin, Sudbury | 26.9* | 63.0 | 35.2* | 6.1 | 88.5 |
| Muskoka-Parry Sound | 87,000 | 10.1 | 12.0 | 11.2 | Muskoka, Parry Sound, Nipissing, Timiskaming | 25.0* | 61.4 | 34.9* | 5.7 | 89.3 |
| North Bay | 85,000 | 12.0 | 14.6 | 11.8 |
| Timiskaming | 38,000 | 12.9 | 15.2 | 15.8 |
| Thunder Bay | 157,000 | 11.1 | 10.8 | 10.9 | Thunder Bay, Kenora, Rainy River | 27.8* | 63.4 | 35.4* | 6.5 | 90.8 |
| Northwestern | 87,000 | 11.7 | 8.0 | 15.4 |
|  |  |  |  |  |  |  |  |  |  |  |
| Ontario | 10,419,000 | 9.1 | 14.8 | 10.0 | Ontario | 20.9 | 60.9 | 28.0 | 4.9 | 89.4 |

**Data Source:** Statistics Canada 1996 Census and 1996/97 National Population Health Survey

Notes:

**Unemp. Rate:** % of unemployed labour force aged 15+ to total labour force aged 15+; **Low Income:** % of families below the low-income cut-off (based on 1995 income levels); **< Gr. 9 Educ.:** % of population aged 15+ with < grade 9 education; **Reg. Smoker.:** % of population aged 12+ who smoke cigarettes on a daily basis; **Reg. Exercise:** % of population aged 12+ who exercise frequently; **BMI >27:** % of population aged 12+ with body mass index > 27; **Heavy Drink.:** % of current drinkers aged 12+ who consume 15+ drinks in the previous week; **Social Support:** % of population aged 12+ with a high social support index

* Significantly different from provincial rate (p <0.05) (for 1996/97 National Population Health Survey data)

† Derived geographic areas from the 1996/97 National Population Health Survey
